# Supplementary material
Source: PubMed Central journal article supplement (PMC2924433)
Supplement: NIHMS221242-supplement-Supp_Fig_S4.pdf [file NIHMS221242-supplement-Supp_Fig_S4.pdf]

Fig. S4, Red-Horse (Krasnow)
