# Supplementary material
Source: PubMed Central journal article supplement (PMC2924433)
Supplement: NIHMS221242-supplement-Table.pdf [file NIHMS221242-supplement-Table.pdf]

**Table S1.** Coronary vessel clones generated by tamoxifen-induction of VE-cadherin-CreER<sup>3</sup>

| Clone type and name |          | Clone induction and analysis |      |             |                             |                 | Distribution of marked cells in clone |         |         |           |          |            |       |
|---------------------|----------|------------------------------|------|-------------|-----------------------------|-----------------|---------------------------------------|---------|---------|-----------|----------|------------|-------|
| Type <sup>b</sup>   | Clone ID | Stage of clone               |      |             | Coronary (art) <sup>d</sup> | SV              | Atria endo                            |         |         |           | Peri mem | Aorta endo | Liver |
|                     |          | induction/analysis           | Days | Label       |                             |                 | Dorsal                                | Ventral | cushion | Ventricle |          |            |       |
| I                   | 1        | e9.5/13.5                    | 4    | Multi-color | 156                         | 50              |                                       |         |         |           |          |            |       |
| I                   | 2        | e9.5/13.5                    | 4    | Multi-color | 158                         | 64              |                                       |         |         |           |          |            |       |
| I                   | 3        | e9.5/13.5                    | 4    | Multi-color | 91                          | 23              |                                       |         |         |           |          |            |       |
| I                   | 4        | e9.5/13.5                    | 4    | lacZ        | 6                           | 18              | 19                                    |         |         |           |          |            |       |
| I                   | 5        | e9.5/13.5                    | 4    | Multi-color | 167                         | 73              |                                       |         |         |           |          |            | 56    |
| I                   | 6        | e8.5/13.5                    | 5    | Multi-color | 204                         | 100             |                                       |         |         |           |          |            |       |
| I                   | 7        | e8.5/13.5                    | 5    | Multi-color | 315                         | 128             |                                       |         |         |           |          |            |       |
| I                   | 8        | e8.5/13.5                    | 5    | Multi-color | 562                         | 59              |                                       |         |         |           |          |            |       |
| I                   | 9        | e8.5/13.5                    | 5    | Multi-color | 530                         | 43              |                                       |         | 75      |           |          |            |       |
| I                   | 10       | e8.5/13.5                    | 5    | Multi-color | 650                         | 110             |                                       |         | 34      |           |          |            |       |
| I                   | 11       | e8.5/13.5                    | 5    | Multi-color | 376 (20)                    | 88              |                                       |         | 10      |           |          | 8          |       |
| I                   | 12       | e8.5/13.5                    | 5    | Multi-color | 244 (1)                     | 44              | 15                                    |         | 81      |           |          |            |       |
| I                   | 13       | e8.5/13.5                    | 5    | lacZ        | 25                          | 88              |                                       |         | 9       |           |          |            |       |
| I                   | 14       | e8.5/13.5                    | 5    | Multi-color | 441                         | 158             | 129                                   |         |         | 5         |          |            |       |
| I                   | 15       | e8.5/13.5                    | 5    | Multi-color | 65                          | 124             | 28                                    |         |         |           |          |            |       |
| I                   | 16       | e8.5/13.5                    | 5    | Multi-color | 473 (4)                     | 118             | 19                                    |         |         |           |          | 6          |       |
| I                   | 17       | e8.5/14.5                    | 6    | lacZ        | 696                         | 118             |                                       |         |         |           |          |            |       |
| I                   | 18       | e8.5/14.6                    | 6    | lacZ        | 707 (10)                    | 193             |                                       |         |         |           |          |            |       |
| I                   | 19       | e8.5/14.5                    | 6    | lacZ        | 222                         | 65              |                                       |         |         |           |          |            |       |
| I                   | 20       | e8.5/14.5                    | 6    | lacZ        | 6                           | 16              |                                       |         |         |           |          |            |       |
| I                   | 21       | e8.5/14.5                    | 6    | Multi-color | 79                          | 3               | 15                                    |         |         |           |          |            |       |
| I                   | 22       | e8.5/14.5                    | 6    | Multi-color | 556 (3)                     | 55              | 43                                    |         |         |           |          |            |       |
| I                   | 23       | e8.5/14.5                    | 6    | Multi-color | 160                         | 149             | 163                                   |         |         |           |          |            |       |
| I                   | 24       | e7.5/14.5                    | 7    | lacZ        | 286 <sup>c</sup>            | 37 <sup>c</sup> | 185                                   |         |         |           |          |            |       |
| I                   | 25       | e7.5/14.5                    | 7    | Multi-color | 570 (22) <sup>c</sup>       | 53              | 188                                   |         | 203     |           |          |            |       |
| II                  | 26       | e8.5/13.5                    | 5    | Multi-color | 12 <sup>c</sup>             |                 | 341                                   |         |         |           |          |            |       |
| III                 | 27       | e8.5/13.5                    | 5    | Multi-color | 20                          |                 |                                       |         | 167     |           |          |            |       |
| III                 | 28       | e8.5/13.5                    | 5    | Multi-color | 14                          |                 |                                       |         | 448     | 16        |          |            |       |
| III                 | 29       | e8.5/13.5                    | 5    | Multi-color | 52                          |                 |                                       |         | 122     | 8         |          |            |       |
| III                 | 30       | e8.5/14.5                    | 6    | lacZ        | 51                          |                 |                                       |         | 18      |           |          |            |       |
| III                 | 31       | e8.5/14.5                    | 6    | lacZ        | 28                          |                 |                                       |         | 243     |           |          |            |       |
| III                 | 32       | e8.5/14.5                    | 6    | Multi-color | 56 (yes)                    |                 |                                       |         | 137     |           |          |            |       |
| III                 | 33       | e8.5/14.5                    | 6    | Multi-color | 84                          |                 | 49                                    |         | 722     |           |          |            |       |
| III                 | 34       | e7.5/13.5                    | 6    | lacZ        | 56                          |                 |                                       |         | 205     | 21        |          |            |       |
| IV                  | 35       | e7.5/13.5                    | 6    | lacZ        |                             |                 |                                       |         | 322     | 13        |          |            |       |
| V                   |          | e9.5/13.5                    | 4    | Multi-color |                             |                 |                                       |         | 56      |           |          |            |       |
| V                   |          | e9.5/13.5                    | 4    | Multi-color |                             |                 |                                       |         | 89      |           |          |            |       |
| V                   |          | e9.5/13.5                    | 4    | Multi-color |                             |                 |                                       |         | 34      |           |          |            |       |
| V                   | 36       | e9.5/13.5                    | 4    | lacZ        |                             |                 |                                       |         | 78      |           |          |            |       |
| V                   |          | e8.5/13.5                    | 5    | Multi-color |                             |                 |                                       |         | 229     |           |          |            |       |
| V                   |          | e8.5/13.5                    | 5    | Multi-color |                             |                 |                                       |         | 209     |           |          |            |       |
| V                   |          | e8.5/13.5                    | 5    | Multi-color |                             |                 |                                       |         | 288     |           |          |            |       |
| V                   |          | e8.5/13.5                    | 5    | Multi-color |                             |                 |                                       |         | 81      |           |          |            |       |
| V                   |          | e8.5/13.5                    | 5    | Multi-color |                             |                 |                                       |         | 236     |           |          |            |       |
| V                   |          | e8.5/13.5                    | 5    | Multi-color |                             |                 |                                       |         | 330     |           |          |            |       |
| V                   |          | e8.5/13.5                    | 5    | Multi-color |                             |                 |                                       |         | 303     |           |          |            |       |
| V                   |          | e8.5/13.5                    | 5    | Multi-color |                             |                 |                                       |         | 56      |           |          |            |       |
| V                   |          | e8.5/13.5                    | 5    | Multi-color |                             |                 |                                       |         | 269     |           |          |            |       |
| V                   | 37       | e8.5/13.5                    | 5    | lacZ        |                             |                 |                                       |         | 26      |           |          |            |       |
| V                   | 38       | e8.5/13.5                    | 5    | lacZ        |                             |                 |                                       |         | 52      |           |          |            |       |
| V                   |          | e8.5/13.5                    | 5    | Multi-color |                             |                 |                                       |         | 75      |           |          |            |       |
| V                   |          | e8.5/13.5                    | 5    | Multi-color |                             |                 |                                       |         | 86      |           |          |            |       |
| V                   |          | e8.5/13.5                    | 5    | Multi-color |                             |                 |                                       |         | 92      |           |          |            |       |
| V                   |          | e8.5/13.5                    | 5    | Multi-color |                             |                 |                                       |         | 53      |           |          |            |       |
| V                   |          | e8.5/13.5                    | 5    | Multi-color |                             |                 |                                       |         | 168     |           |          |            |       |
| V                   |          | e8.5/13.5                    | 5    | Multi-color |                             |                 |                                       |         | 133     |           |          |            |       |
| V                   |          | e8.5/13.5                    | 5    | Multi-color |                             |                 |                                       |         | 150     |           |          |            |       |
| V                   |          | e8.5/13.5                    | 5    | Multi-color |                             |                 |                                       |         | 104     |           |          |            |       |
| V                   |          | e8.5/13.5                    | 5    | Multi-color |                             |                 |                                       |         | 338     |           |          |            |       |
| V                   |          | e8.5/13.5                    | 5    | Multi-color |                             |                 |                                       |         | 86      |           |          |            |       |
| V                   |          | e8.5/13.5                    | 5    | Multi-color |                             |                 |                                       |         | 75      |           |          |            |       |
| V                   |          | e7.5/13.5                    | 6    | lacZ        |                             |                 |                                       |         | 183     |           |          |            |       |
| V                   |          | e7.5/13.5                    | 6    | lacZ        |                             |                 |                                       |         | 125     |           |          |            |       |
| V                   |          | e7.5/13.5                    | 6    | lacZ        |                             |                 |                                       |         | 221     |           |          |            |       |
| V                   |          | e8.5/14.5                    | 6    | lacZ        |                             |                 |                                       |         | 182     |           |          |            |       |
| V                   | 39       | e7.5/13.5                    | 6    | lacZ        |                             |                 |                                       |         | 92      |           |          |            |       |
| V                   |          | e8.5/14.5                    | 6    | lacZ        |                             |                 |                                       |         | 115     |           |          |            |       |
| V                   |          | e8.5/14.5                    | 6    | Multi-color |                             |                 |                                       |         | 540     |           |          |            |       |
| V                   |          | e8.5/14.5                    | 6    | Multi-color |                             |                 |                                       |         | 358     |           |          |            |       |
| V                   |          | e7.5/14.5                    | 7    | lacZ        |                             |                 |                                       |         | 284     |           |          |            |       |
| V                   |          | e7.5/14.5                    | 7    | Multi-color |                             |                 |                                       |         | 569     |           |          |            |       |
| V                   |          | e7.5/14.5                    | 7    | Multi-color |                             |                 |                                       |         | 401     |           |          |            |       |
| V                   |          | e7.5/14.5                    | 7    | Multi-color |                             |                 |                                       |         | 705     |           |          |            |       |
| VI                  |          | e9.5/13.5                    | 4    | lacZ        |                             |                 |                                       |         | 40      | 10        |          |            |       |
| VII                 |          | e8.5/13.5                    | 5    | Multi-color |                             | 87              |                                       |         |         |           |          |            |       |
| VIII                | 40       | e9.5/13.5                    | 4    | lacZ        |                             |                 | 19                                    |         |         |           |          |            |       |
| VIII                | 41       | e8.5/13.5                    | 5    | Multi-color |                             |                 | 88                                    |         |         |           |          |            |       |
| VIII                |          | e8.5/13.5                    | 5    | Multi-color |                             |                 | 88                                    |         |         |           |          |            |       |
| VIII                |          | e8.5/13.5                    | 5    | Multi-color |                             |                 | 164                                   |         |         |           |          |            |       |
| VIII                | 42       | e7.5/13.5                    | 6    | lacZ        |                             |                 | 26                                    |         |         |           |          |            |       |
| VIII                |          | e8.5/14.5                    | 6    | lacZ        |                             |                 | 67                                    |         |         |           |          |            |       |

<sup>a</sup> Abbreviations: art, coronary artery; SV, sinus venosus; endo, endocardium; ven, ventricle; BI, blood island; Peri mem, percardial membrane; hrt, heart

<sup>b</sup> Clone types: I, Clones with coronary vessel and sinus venosus cells and other cell types where indicated ; II: Coronary vessel and atria endocardium;

III, Coronary vessel and ventricle endocardium +/- bi; IV, Ventricle endocardium and bi; V, Ventricle endocardium; VI, Ventricle endocardium and

pericardial membrane vessels; VII, Sinus venosus alone; VIII, Atria endocardium alone (dozens more were found but not shown)

<sup>c</sup> Counts may be an underestimate due to missing tissue sections

<sup>d</sup> The values in parentheses are number of total cells in clone that were in histologically identified coronary arteries.
