# Supplementary material
Source: PubMed Central journal article supplement (PMC2924433)

Fig. S8, Red-Horse (Krasnow)

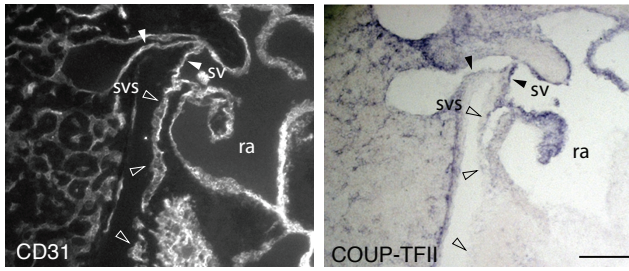

Supplement: NIHMS221242-supplement-Supp_Fig_S8.pdf [file NIHMS221242-supplement-Supp_Fig_S8.pdf]

Fig. S9, Red-Horse (Krasnow)

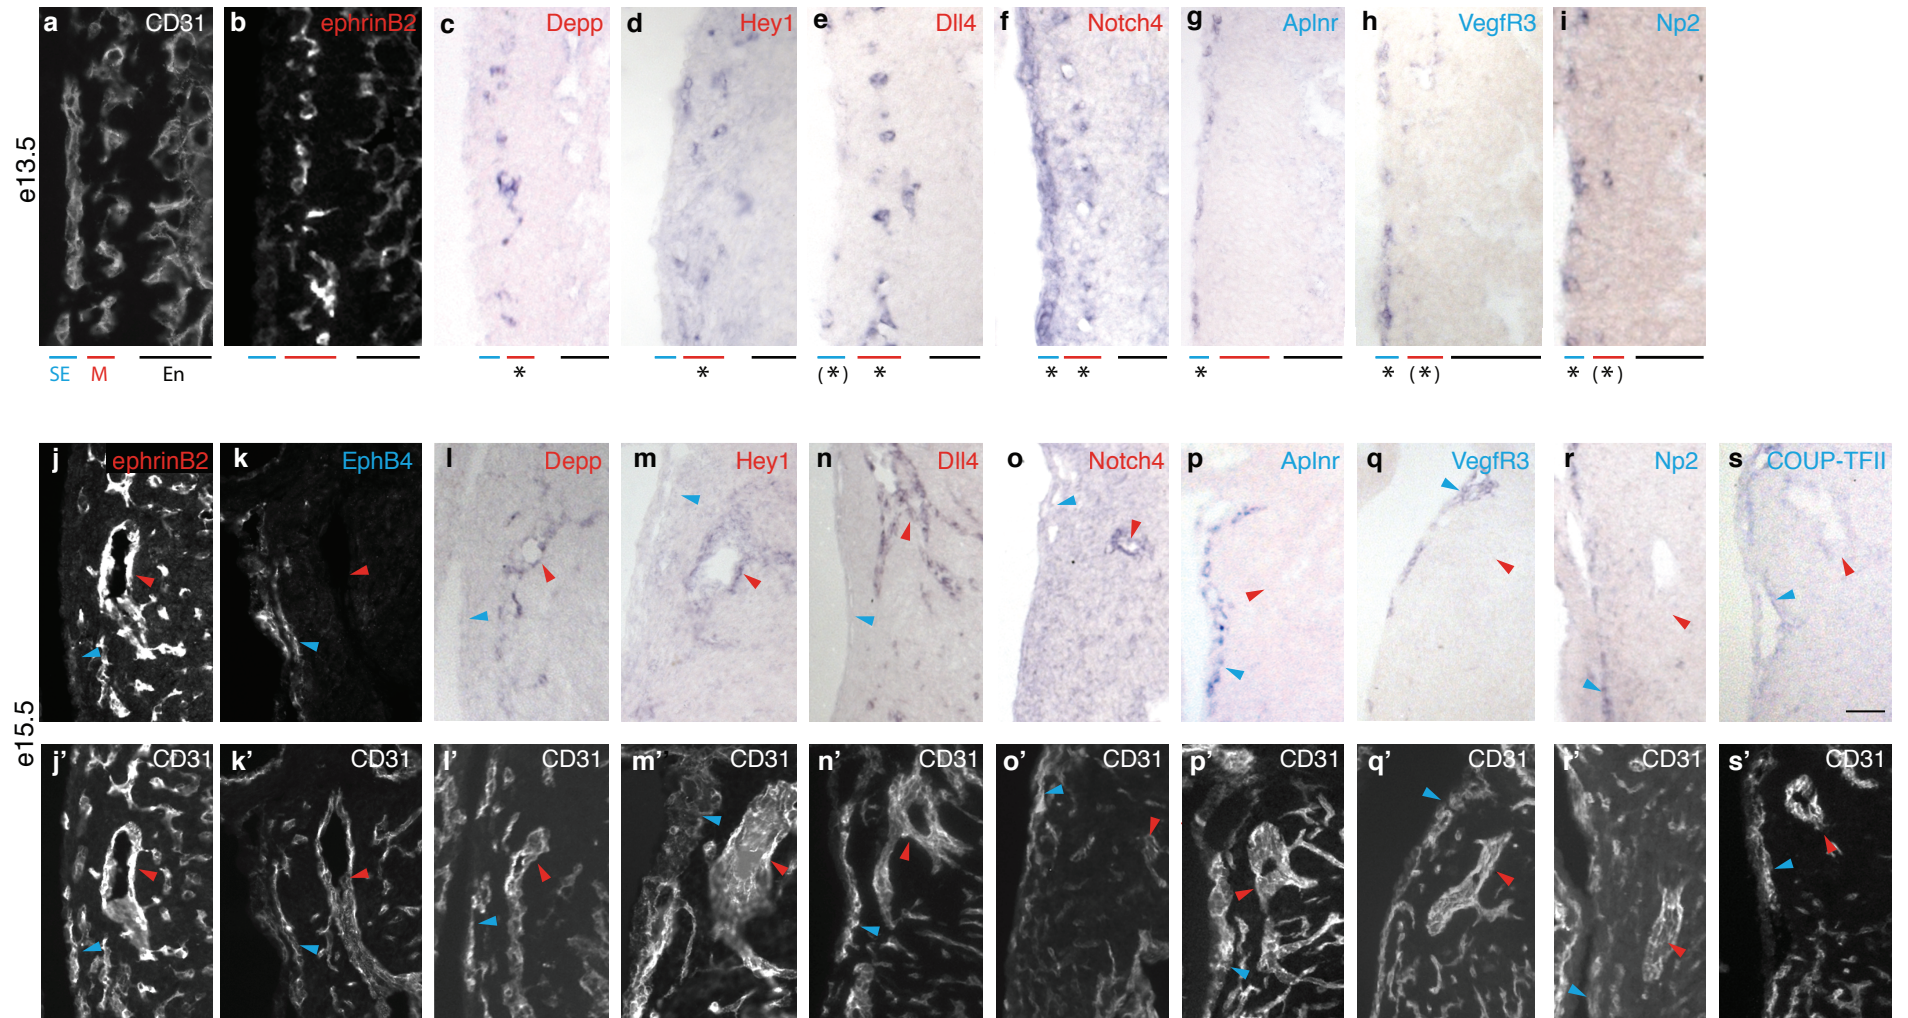

Supplement: NIHMS221242-supplement-Supp_Fig_S9.pdf [file NIHMS221242-supplement-Supp_Fig_S9.pdf]
